# Supplementary material for: Ribosome binding induces repositioning of the signal recognition particle receptor on the translocon
Source: PubMed Central journal article supplement — J Cell Biol. 2015 Oct 12;211(1):91–104. doi: 10.1083/jcb.201502103 (PMC4602035; doi:10.1083/jcb.201502103), 2015-10-12
Supplement: supp_jcb.201502103_JCB_201502103_sm.pdf [file supp_jcb.201502103_JCB_201502103_sm.pdf]

Kuhn et al., <http://www.jcb.org/cgi/content/full/jcb.201502103/DC1>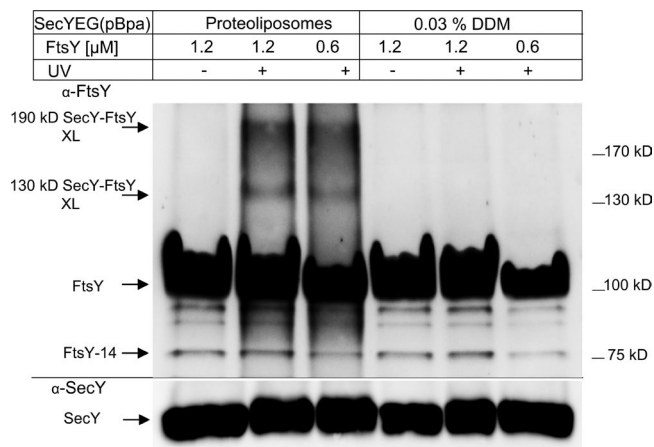

Figure S1. **The SecY-FtsY interaction requires the presence of lipids.** SecYEG(pBpa) PLs or SecYEG(pBpa) in detergent solution (0.03% DDM) were incubated with different FtsY concentrations and UV activated. Samples after UV activation were directly separated by SDS-PAGE without prior carbonate extraction. After Western blotting, the membrane was decorated with antibodies against FtsY (top). As a loading control, the lower part of the gel was decorated with antibodies against SecY (bottom). Conditions for cross-linking were as described in the legends for Figs. 1 and 2.

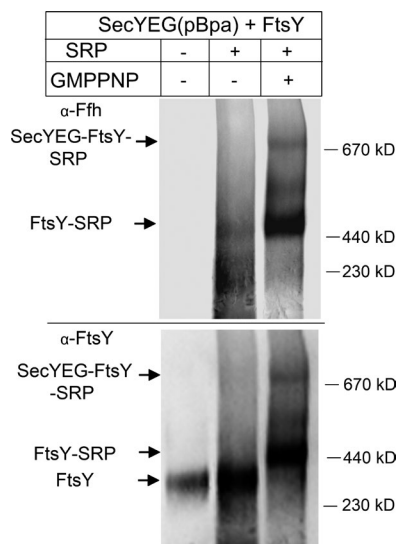

Figure S2. **Detection of FtsY-SRP and SecYEG-FtsY-SRP complexes by blue native PAGE.** SecYEG(pBpa) PLs (final SecYEG concentration 10 nM) were incubated with FtsY (1.2  $\mu$ M) in the absence or in the presence of SRP (1  $\mu$ M) and GMP-PNP (0.5 mM). After UV exposure, the samples were solubilized, Blue native-PAGE loading dye was added to a final concentration of 10% (vol/vol), and the samples were loaded on a 4%–16% native PAGE. After Western transfer, the membrane was decorated with antibodies against Ffh (top) and FtsY (bottom). Indicated are FtsY, the FtsY-SRP complex at ~400 kD, and the SecYEG-FtsY-SRP complex at ~700 kD (Braig et al., 2011). Note that migration on blue native-PAGE does not correspond to the predicted mass of a complex because it is influenced by the 3D structure of the complex and the amounts of detergent and Coomassie blue bound to it (Heuberger et al., 2002).

## References

- Braig, D., M. Mircheva, I. Sachelaru, E.O. van der Sluis, L. Sturm, R. Beckmann, and H.G. Koch. 2011. Signal sequence-independent SRP-SR complex formation at the membrane suggests an alternative targeting pathway within the SRP cycle. *Mol. Biol. Cell.* 22:2309–2323. <http://dx.doi.org/10.1091/mbc.E11-02-0152>
- Heuberger, E.H., L.M. Veenhoff, R.H. Duurkens, R.H. Friesen, and B. Poolman. 2002. Oligomeric state of membrane transport proteins analyzed with blue native electrophoresis and analytical ultracentrifugation. *J. Mol. Biol.* 317:591–600. <http://dx.doi.org/10.1006/jmbi.2002.5416>
